# Supplementary material
Source: Springer Nature journal article supplement (https://www.springermedizin.de/resource/supplementary/12906_2011_442_MOESM2_ESM.pdf/9519808)

12 hours

24 hours

72 hours

Day 5

Day 7

Preliminary Study  
(No treatment)  
(Rabbit-3)

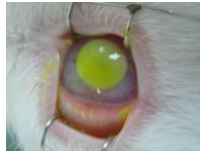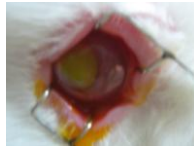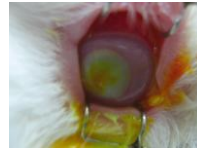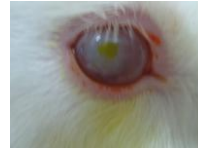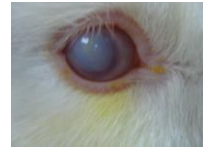

Conventional  
Treated Group  
(Rabbit-4)

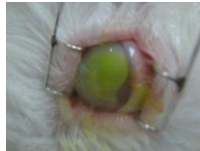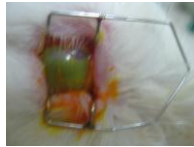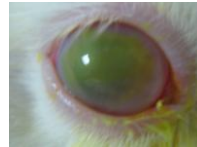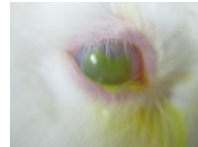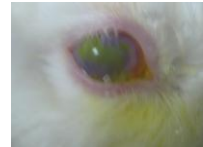

Honey  
Treated Group  
(Rabbit-5)

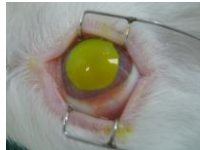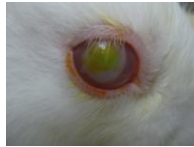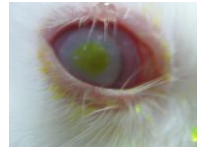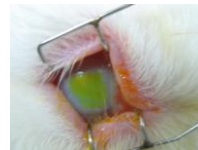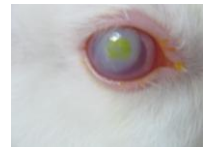

Supplement: MOESM2 [file 9519808]
